# Supplementary material for: Reduced recruitment of 53BP1 during interstrand crosslink repair is associated with genetically inherited attenuation of mitomycin C sensitivity in a family with Fanconi anemia
Source: PubMed Central journal article supplement (PMC5790499; doi:10.18632/oncotarget.23375), 2017-12-17
Supplement: oncotarget-09-3779-s001.pdf [file oncotarget-09-3779-s001.pdf]

# Reduced recruitment of 53BP1 during interstrand crosslink repair is associated with genetically inherited attenuation of mitomycin C sensitivity in a family with Fanconi anemia

## SUPPLEMENTARY MATERIALS

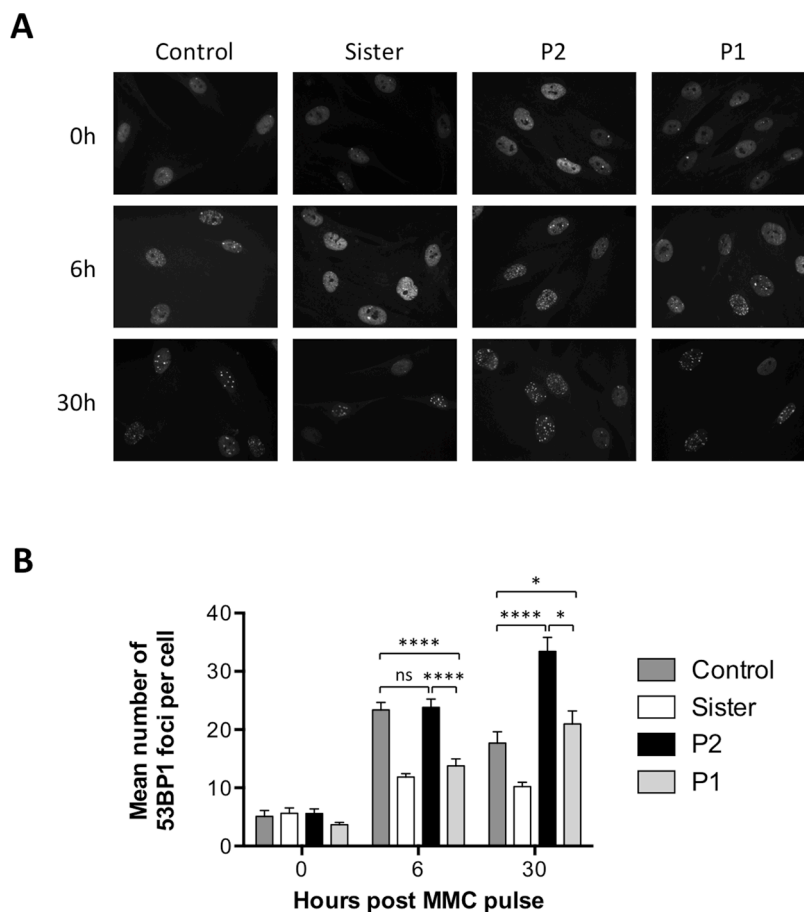

**Supplementary Figure 1: The recruitment of 53BP1 at ICLs is delayed in P1 compared to P2.** (A–B) Recruitment of 53BP1 following MMC treatment. Primary fibroblasts from patients P1, P2, their sister, and a healthy control were pulsed for 1 hour with 1  $\mu$ g/ml MMC and further incubated for the indicated times before fixation and 53BP1 immunostaining. (A) Representative images. (B) Number of foci per cell as quantified from at least 100 nuclei from 3 independent experiments, shown as mean  $\pm$  SEM. Statistical analyses were performed using Mann-Whitney tests. \* $P < 0.01$ ; \*\*\*\* $P < 0.0001$ ; ns: not significant.

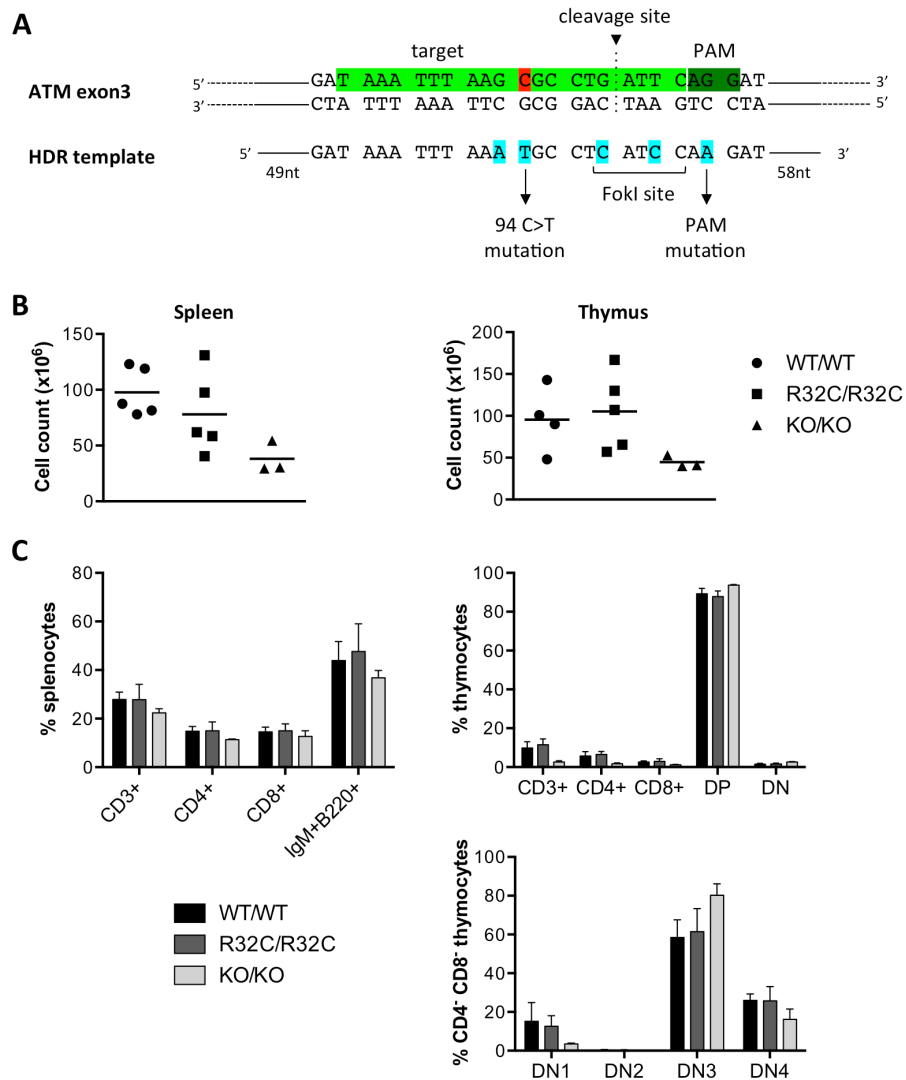

**Supplementary Figure 2: Generation and immunophenotyping of ATM R32C homozygous mice.** (A) Sequences of the CRISPR-Cas9 target in exon 3 of mouse ATM and of the HDR template used to generate the ATM R32C mouse line. (B–C) Immunophenotyping results obtained from ATM WT/WT ( $n = 5$ ), R32C/R32C ( $n = 5$ ) or ATM KO/KO ( $n = 3$ ) mice. (B) Splenocytes and thymocytes cell counts. (C) Percentages of immune cell populations determined by flow cytometry after CD3/CD4/CD8/B220/IgM or CD3/CD4/CD8/CD44/CD25 staining of splenocytes or thymocytes respectively. DP: double positive (CD4+ CD8+). DN: double negative (CD4– CD8–). Percentages of DN1 (CD44+CD25–), DN2 (CD44+CD25+), DN3 (CD44–CD25+) and DN4 (CD44–CD25–) cells were calculated among the DN thymocytes.

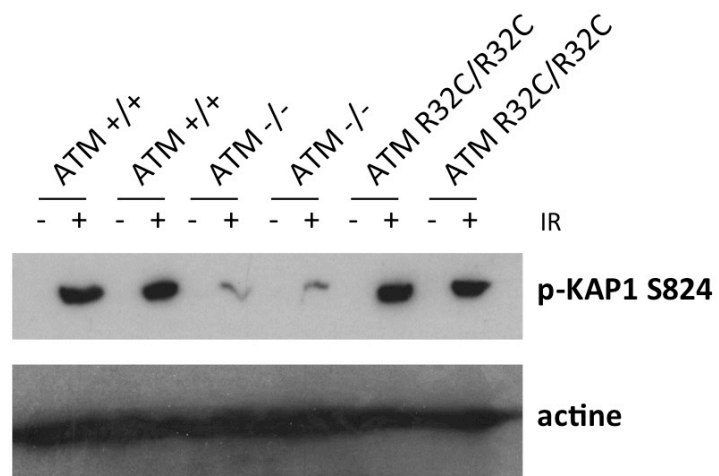

**Supplementary Figure 3: T cells from ATM R32C homozygous mice have a normal response to IR.** CD3/CD28 activated splenocytes from ATM +/+, -/- or R32C/R32C mice were irradiated and cell extracts were analyzed by phospho-Kap1 S824 immunoblot. Actine immunoblot served as loading control.
